# Supplementary material for: Drug Addiction Endophenotypes: Impulsive Versus Sensation-Seeking Personality Traits
Source: PubMed Central journal article supplement (PMC3485555; doi:10.1016/j.biopsych.2010.06.015), 2010-10-15
Supplement: mmc1.pdf [file mmc1.pdf]

## Supplemental Information

Impulsivity and sensation-seeking were significantly correlated in drug users ( $r = 0.54$ ,  $P < 0.01$ ) but not in controls ( $r = 0.34$ ,  $P > 0.05$ ) or in their siblings ( $r = 0.12$ ,  $P > 0.05$ ).

BIS-11 and SSS-V total scores were not correlated with the duration of stimulant abuse or the age of stimulant abuse onset.

We further investigated differences in impulsivity and sensation-seeking traits between smokers ( $n = 21$ ) and non-smokers ( $n = 39$ ) in the siblings and the unrelated healthy volunteers; drug users were excluded from this subgroup analysis since almost all of them were smokers. Smokers reported significantly greater levels of sensation-seeking compared with non-smokers ( $F_{1,56} = 5.65$ ,  $P = 0.021$ ). In contrast to the stimulant drug users, tobacco smoking was associated with increased scores on the experience-seeking subscale ( $F_{1,56} = 10.20$ ,  $P = 0.002$ ) rather than the disinhibition, suggesting that sensation-seeking may be qualitatively different between tobacco smokers depending on whether they are also dependent on stimulant drugs .

Thus, no group differences between smokers and non-smokers were observed on the SSS-subcales of thrill-seeking ( $F_{1,56} = 2.20$ ,  $P = 0.144$ ), disinhibition ( $F_{1,56} = 1.78$ ,  $P = 0.188$ ), and boredom susceptibility ( $F_{1,56} = 0.32$ ,  $P = 0.859$ ). We further observed a trend to greater impulsivity on the BIS-11 in smokers ( $F_{1,56} = 3.52$ ,  $P = 0.066$ ), but this was not formally significant or reflected in differences on the BIS-11 subscales

High levels of impulsivity and sensation-seeking were consistent across stimulant drug users, whether or not they were also dependent on opiates, as no difference on the BIS-11 ( $F_{1,27} = 0.07, P = 0.800$ ) or SSS-V ( $F_{1,27} = 0.20, P = 0.662$ ) scales were observed between stimulant users with ( $n = 13$ ) and without ( $n = 16$ ) co-morbid opiate dependence. There were also no differences between these subgroups on the subscales of both questionnaires.
